# Supplementary material
Source: MDPI journal article supplement (https://www.mdpi.com/2673-9801/2/2/17)
Supplement: s1 [file s1]

**Supplementary Table S1.** Western immunoblot antibody supplier information.

| <b>Target</b>                  | <b>Molecular<br/>Weight (kDa)</b> | <b>Company</b>  | <b>Catalogue<br/>Number</b> | <b>Secondary</b> |
|--------------------------------|-----------------------------------|-----------------|-----------------------------|------------------|
| <b>AGO1</b>                    | 97                                | GeneTex         | GTX47799                    | Anti-Rabbit      |
| <b>AGO2</b>                    | 97                                | ECM Biosciences | AP5281                      | Anti-Rabbit      |
| <b>p-AGO2<sup>Tyr393</sup></b> | 97                                | ECM Biosciences | AP5311                      | Anti-Rabbit      |
| <b>p-AGO2<sup>Ser387</sup></b> | 97                                | ECM Biosciences | AP5291                      | Anti-Rabbit      |
| <b>AGO3</b>                    | 97                                | AbCam           | AB3593                      | Anti-Rabbit      |
| <b>AGO4</b>                    | 97                                | AbCam           | AB85077                     | Anti-Rabbit      |
| <b>DGCR8</b>                   | 86                                | GeneTex         | GTX130061                   | Anti-Rabbit      |
| <b>DICER</b>                   | 220                               | AbClonal        | A6021                       | Anti-Rabbit      |
| <b>DROSHA</b>                  | 160                               | GeneTex         | GTX09511                    | Anti-Rabbit      |
| <b>GW182</b>                   | 180                               | AbClonal        | A6115                       | Anti-Rabbit      |
| <b>PABPC1</b>                  | 71                                | AbClonal        | A14872                      | Anti-Rabbit      |
| <b>PACT</b>                    | 34                                | GeneTex         | GTX114215                   | Anti-Rabbit      |
| <b>RAN-GTP</b>                 | 25                                | GeneTex         | GTX114139                   | Anti-Rabbit      |
| <b>TIAR</b>                    | 42                                | Santa Cruz      | SC398372                    | Anti-Mouse       |
| <b>TIA-1</b>                   | 40                                | Santa Cruz      | SC1751                      | Anti-Goat        |
| <b>TRBP</b>                    | 39                                | GeneTex         | GTX48546                    | Anti-Rabbit      |
| <b>XPO5</b>                    | 136                               | GeneTex         | GTX130727                   | Anti-Rabbit      |
| <b>XRN1</b>                    | 175                               | Santa Cruz      | SC165985                    | Anti- Mouse      |
